# Supplementary material
Source: PubMed Central journal article supplement (PMC2784596)
Supplement: NIHMS2313-supplement-suppmat.pdf [file NIHMS2313-supplement-suppmat.pdf]

# Supplementary Figure 1

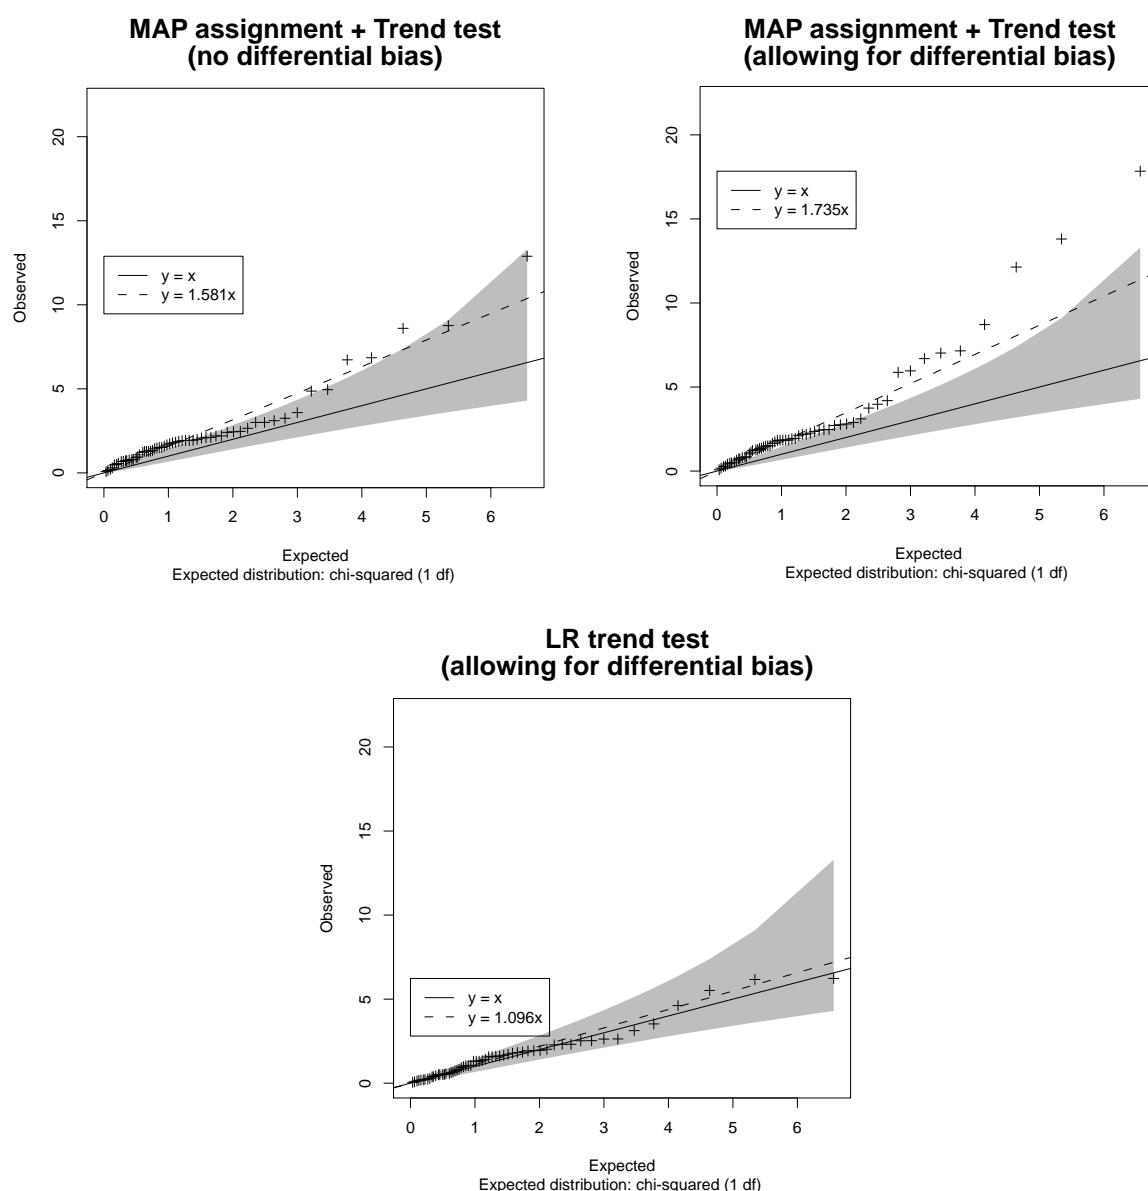

**Supplementary Figure 1. Quantile-Quantile plot of control/control association tests on empirical data on 95 CNVs in Wellcome Trust Case Control Consortium data**

A. the QQ plot resulting from a Cochran-Armitage trend test of the mixture model assignment, not allowing for differential bias; B. the QQ plot resulting from a Cochran-Armitage trend test of the mixture model assignment, allowing for differential bias; C. the QQ plot resulting from the LR trend test. The grey area represents the 95% confidence interval on each quantile.

# Supplementary Figure 2

Quantile-Quantile plot from simulations using identical parameters

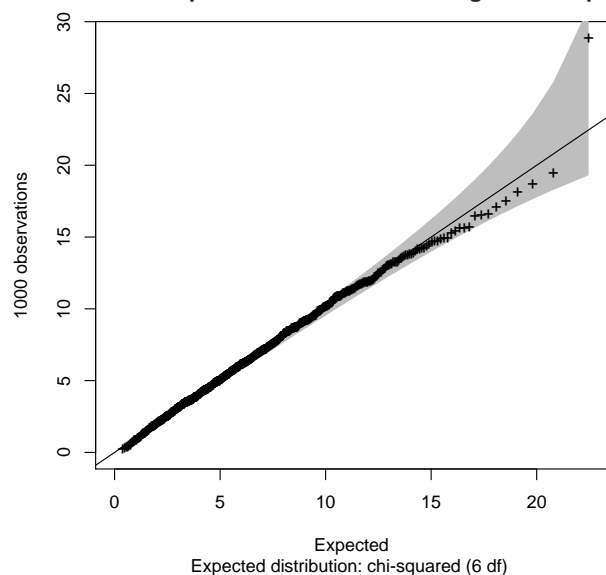

Probability-Probability plot of testing for differential bias at 94 CNVs in the WTCCC control collections

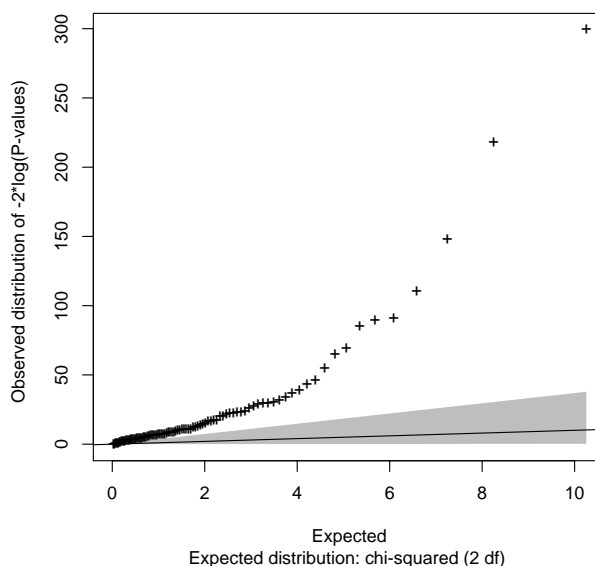

## Supplementary Figure 2. Quantile-Quantile plots of differential bias test statistics in simulations and real data.

Panel A shows a Quantile-Quantile plot of the differential bias test statistic (6df) in 1000 simulations of two samples drawn from the same underlying measurement distribution. Panel B shows a Probability-Probability plot comparing the observed vs. expected distribution when testing for differential bias between the two WTCCC control cohorts at 94 CNVs. Under the null hypothesis the clustering parameters are identical for both cohorts, and under the alternative these parameters are allowed to differ. A P-value is obtained for each of the 94 CNVs, and this figure shows the distribution of  $-2\log(P)$ , which under the null should be distributed as chi-square with 2df. The differing numbers of copy number classes between the 94 CNVs means that test statistics themselves are not directly comparable.

# Supplementary Figure 3

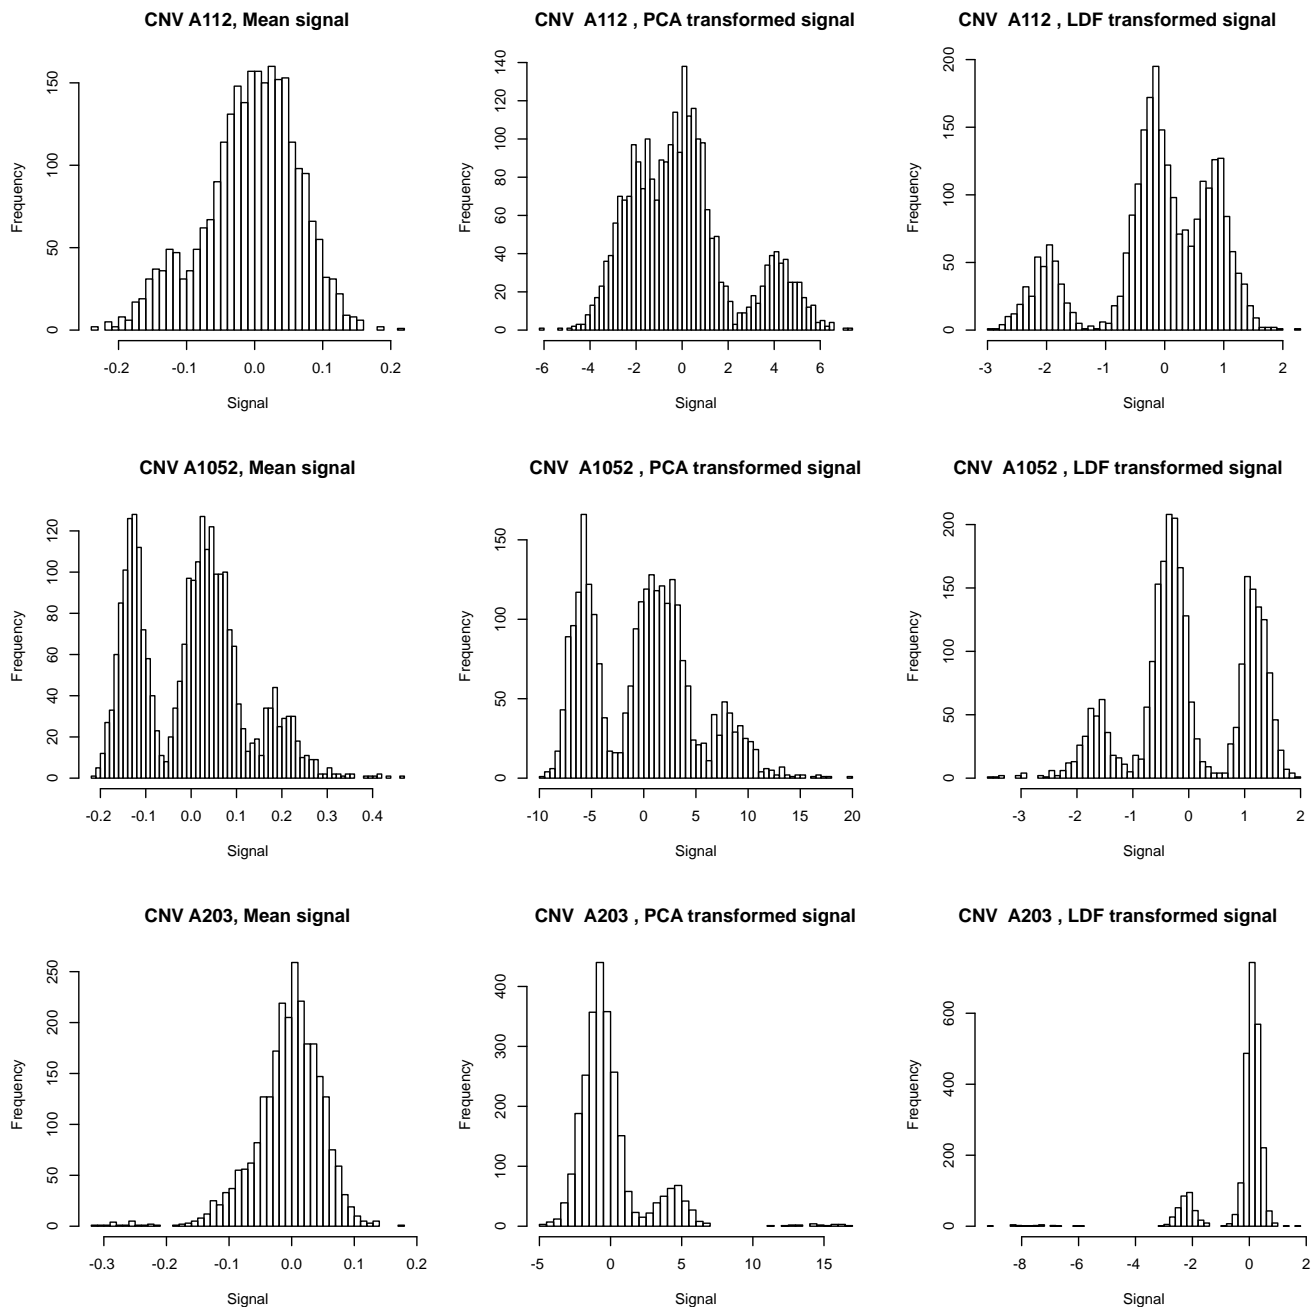

## Supplementary Figure 3. Histograms of copy number signal using different probe summary methods

Histograms of copy number signal are plotted for three different probeset summary methods: mean, Principal Component Analysis (PCA) and Linear Discriminant Function (LDF), see Methods for details, for three CNVs from the WTCCC data (A112, A1052 and A203, described in Supplementary Table 3). The sign of the PCA and LDF transformed measurements are arbitrary, and so cluster positions sometimes appear to be reversed.

# Supplementary Figure 4

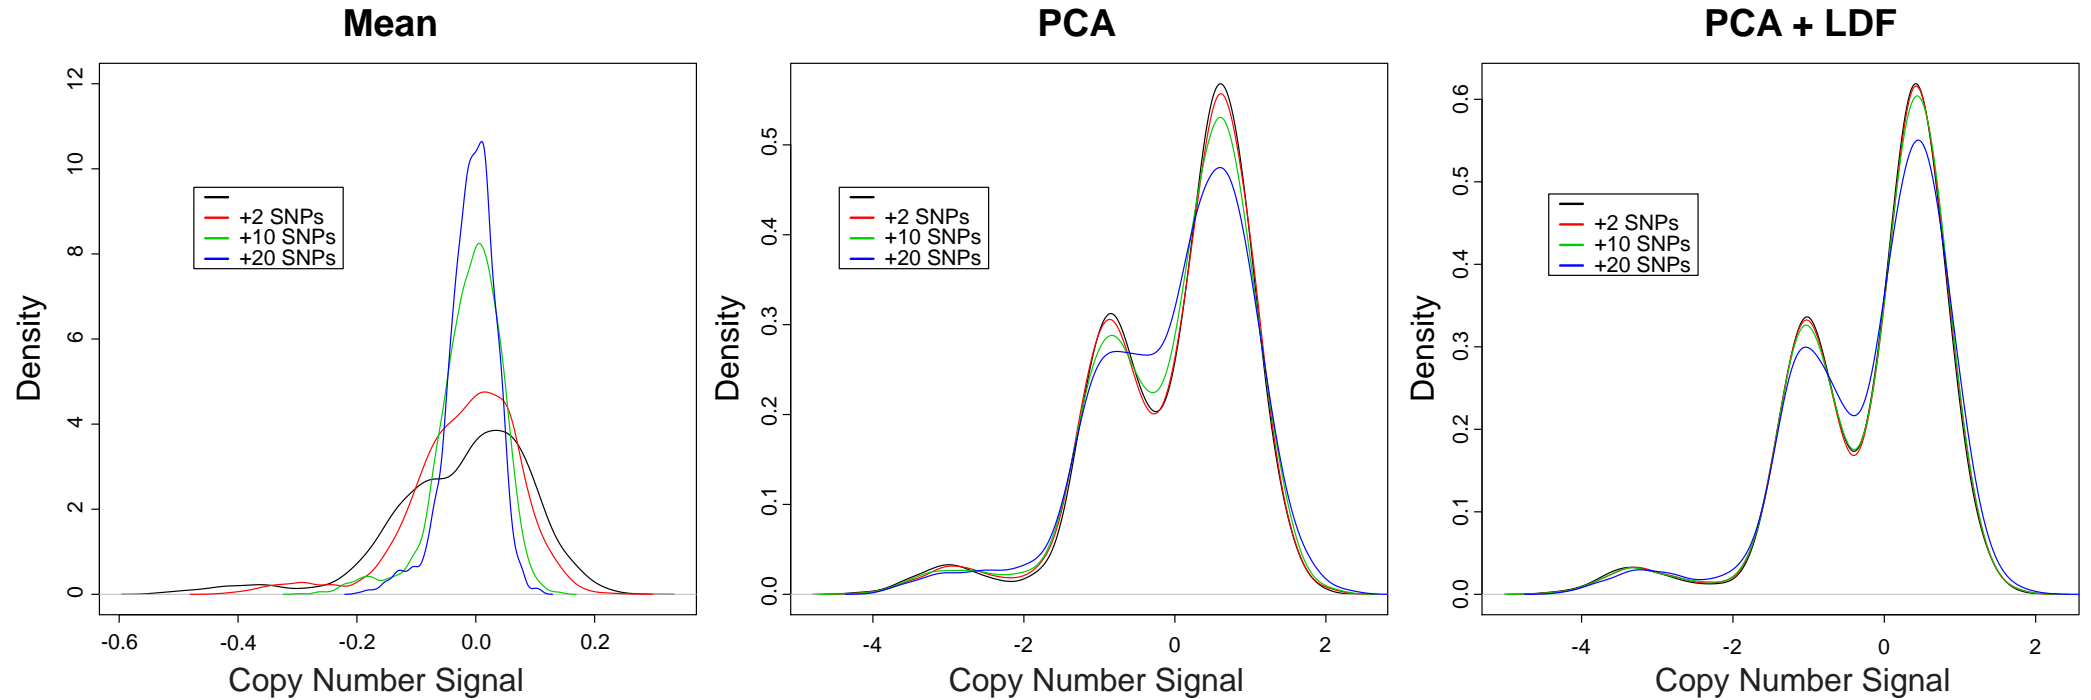

## Supplementary Figure 4. Impact of over-specification of CNV boundaries on different probe summary methods.

The three panels show the performance of three different probe summary methods as the boundaries of a CNV from the WTCCC data are overestimated by 1,5 and 10 SNPs on both flanks. Panel A shows the impact of over-specification on the arithmetic mean, Panel B shows the impact on the first principal component, and Panel C shows the impact on the Linear Discriminant Function applied to the mixture model classification of the first principal component, as described in the main text.

# Supplementary Figure 5

## Power study for a CNV-QT association in a single cohort (no differential bias)

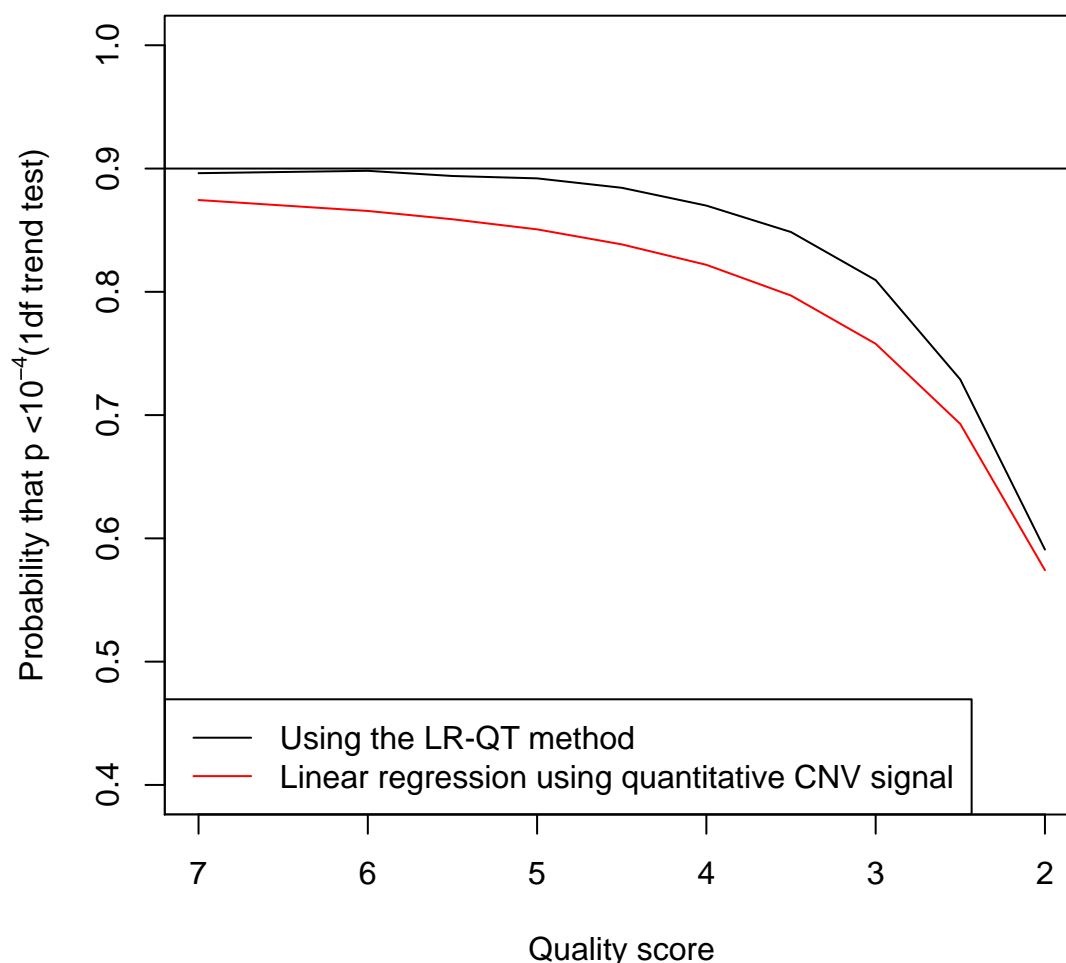

**Supplementary Figure 5. Statistical power of the LR-Quantitative Trait test, relative to linear regression.** Power study using simulated data to measure the statistical power to detect correlations between DNA copy number and quantitative traits. We simulated a cohort of 2,000 individuals with a bi-allelic CNV in Hardy-Weinberg equilibrium with minor allele frequency of 30%. We also assumed a linear relationship between number of copies and the average quantitative trait measurement, and Gaussian noise around the quantitative trait measurements in each copy number class. The model for gene expression and the effect of the number of copies has been set to provide 90% power when the DNA copy number is known with certainty. The black line uses our LR-QT method. The red line directly correlates the measurement from the CNV assay with the gene expression measurement in a linear regression.

**Supplementary Table.****Ninety-five CNVs tested for association between WTCCC control groups**

| <b>CNV_ID</b> | <b>chr</b> | <b>start(b35)</b> | <b>end(b35)</b> | <b>LR trend test statistic</b> | <b>association p value</b> |
|---------------|------------|-------------------|-----------------|--------------------------------|----------------------------|
| W254          | 1          | 73355013          | 73623441        | 0.2181867                      | 0.64                       |
| W463          | 1          | 162356681         | 162426576       | 0.5721205                      | 0.449                      |
| W482          | 1          | 165856060         | 166007288       | 2.280705                       | 0.131                      |
| W504          | 1          | 172968878         | 173023892       | 0.04139505                     | 0.839                      |
| W523          | 1          | 177914644         | 178027769       | 9.41E-06                       | 0.998                      |
| W547          | 1          | 182904835         | 182937524       | 0.1943785                      | 0.659                      |
| W795          | 2          | 2575107           | 2597548         | 1.060549                       | 0.303                      |
| W798          | 2          | 2803328           | 2844314         | 0.08718403                     | 0.768                      |
| W803          | 2          | 3000334           | 3188301         | 1.933595                       | 0.164                      |
| W862          | 2          | 14651055          | 14660690        | 0.5115853                      | 0.474                      |
| W942          | 2          | 37832592          | 37916099        | 0.2338394                      | 0.629                      |
| W1045         | 2          | 63221880          | 63851068        | 0.2838643                      | 0.594                      |
| W1103         | 2          | 79384352          | 79388559        | 0.05961949                     | 0.807                      |
| W1117         | 2          | 82106021          | 82234972        | 0.01199373                     | 0.913                      |
| W1118         | 2          | 82287535          | 82436383        | 0.2272044                      | 0.634                      |
| W1626         | 2          | 239264981         | 239292492       | 2.528389                       | 0.112                      |
| W1944         | 3          | 100210983         | 100225648       | 1.036198                       | 0.309                      |
| W1977         | 3          | 113585255         | 113596024       | 1.297669                       | 0.255                      |
| W2033         | 3          | 131233075         | 131291453       | 0.400479                       | 0.527                      |
| W2044         | 3          | 134222823         | 134288270       | 0.01438993                     | 0.905                      |
| W2137         | 3          | 162880168         | 163020601       | 0.2169759                      | 0.641                      |
| W2142         | 3          | 166523818         | 166555708       | 0.01525146                     | 0.902                      |
| W2272         | 4          | 6531318           | 6541270         | 0.2006228                      | 0.654                      |
| W2280         | 4          | 9856891           | 10083263        | 1.785735                       | 0.181                      |
| W2433         | 4          | 42965948          | 43048682        | 0.1067171                      | 0.744                      |
| W2454         | 4          | 52539564          | 52753517        | 0.3228591                      | 0.57                       |
| W2664         | 4          | 120566529         | 120872359       | 2.311583                       | 0.128                      |
| W2755         | 4          | 153147391         | 153154372       | 1.822218                       | 0.177                      |
| W2960         | 5          | 15706765          | 15776346        | 1.3418                         | 0.247                      |
| W3207         | 5          | 97076449          | 97125076        | 0.07117197                     | 0.79                       |
| W3210         | 5          | 98136658          | 98375543        | 6.23012                        | 0.0126                     |
| W3306         | 5          | 126463761         | 126602292       | 2.018718                       | 0.155                      |
| W3444         | 5          | 165703458         | 165716625       | 2.631765                       | 0.105                      |
| W3708         | 6          | 45106893          | 45458085        | 0.04450124                     | 0.833                      |
| W3754         | 6          | 67065532          | 67106127        | 0.72747                        | 0.394                      |
| W3784         | 6          | 77496587          | 77558299        | 0.2436023                      | 0.622                      |
| W3786         | 6          | 79036117          | 79083405        | 0.04823872                     | 0.826                      |
| W3789         | 6          | 79620938          | 79839756        | 0.0915497                      | 0.762                      |
| W3948         | 6          | 130589849         | 130691297       | 0.638522                       | 0.424                      |
| W4305         | 7          | 64001544          | 64687746        | 0.07033807                     | 0.791                      |
| W4341         | 7          | 77504262          | 77609125        | 0.0268241                      | 0.87                       |
| W4355         | 7          | 82208167          | 82258900        | 0.1671222                      | 0.683                      |
| W4569         | 7          | 149650799         | 149790679       | 1.303119                       | 0.254                      |
| W4888         | 8          | 93077468          | 93173097        | 0.1586687                      | 0.69                       |
| W4907         | 8          | 98797002          | 98919923        | 0.4462098                      | 0.504                      |

|       |    |           |           |             |        |
|-------|----|-----------|-----------|-------------|--------|
| W5041 | 8  | 137757137 | 137933062 | 0.1778802   | 0.673  |
| W5042 | 8  | 138362332 | 138406796 | 1.418262    | 0.234  |
| W5055 | 8  | 141689895 | 142036454 | 0.1371476   | 0.711  |
| W5157 | 9  | 21673289  | 21807777  | 0.5046897   | 0.477  |
| W5224 | 9  | 38761831  | 44108554  | 0.5120674   | 0.474  |
| W5293 | 9  | 87186120  | 87198911  | 6.167063    | 0.013  |
| W5351 | 9  | 101793026 | 101801974 | 0.6557536   | 0.418  |
| W5379 | 9  | 107801610 | 107808792 | 0.06216589  | 0.803  |
| W5576 | 10 | 13096593  | 13104229  | 0.981545    | 0.322  |
| W5669 | 10 | 27262326  | 27270681  | 1.923495    | 0.165  |
| W5701 | 10 | 33292269  | 33351038  | 1.658113    | 0.198  |
| W5883 | 10 | 90363825  | 90523215  | 0.02438729  | 0.876  |
| W5885 | 10 | 90786131  | 90797223  | 1.845579    | 0.174  |
| W5898 | 10 | 93335238  | 93339994  | 4.616483    | 0.0317 |
| W5930 | 10 | 101645317 | 101754574 | 0.1928718   | 0.661  |
| W6210 | 11 | 24596631  | 24596789  | 0.1540546   | 0.695  |
| W6368 | 11 | 76445890  | 76470079  | 0.1000863   | 0.752  |
| W6462 | 11 | 99017466  | 99070312  | 3.525258    | 0.0604 |
| W6489 | 11 | 107461287 | 107885084 | 0.1798609   | 0.671  |
| W6641 | 12 | 7854479   | 8279923   | 0.5014894   | 0.479  |
| W6740 | 12 | 30247605  | 30260529  | 2.624342    | 0.105  |
| W6747 | 12 | 31130867  | 31301551  | 0.03462076  | 0.852  |
| W6755 | 12 | 33176320  | 33224334  | 0.007211411 | 0.932  |
| W7275 | 13 | 69627005  | 69687992  | 1.949261    | 0.163  |
| W7763 | 14 | 92665344  | 92699712  | 0.02776828  | 0.868  |
| W7789 | 14 | 97677436  | 97717303  | 0.0066519   | 0.935  |
| W7821 | 14 | 105149735 | 106287351 | 0.3778723   | 0.539  |
| W7824 | 15 | 22580329  | 22580344  | 0.3909269   | 0.532  |
| W7891 | 15 | 41619215  | 41834930  | 2.315479    | 0.128  |
| W8177 | 16 | 21441805  | 22620480  | 0.9271343   | 0.336  |
| W8199 | 16 | 28023752  | 28173286  | 1.301272    | 0.254  |
| W8203 | 16 | 34307201  | 34618468  | 1.722144    | 0.189  |
| W8438 | 17 | 16512229  | 16732685  | 0.2836425   | 0.594  |
| W8458 | 17 | 25937741  | 26289747  | 0.09414661  | 0.759  |
| W8495 | 17 | 40343050  | 40347575  | 2.522201    | 0.112  |
| W8497 | 17 | 41134385  | 41357489  | 1.615035    | 0.204  |
| W8498 | 17 | 41518415  | 42144468  | 0.5719503   | 0.449  |
| W8641 | 17 | 73152020  | 73160154  | 1.561511    | 0.211  |
| W8760 | 18 | 33555925  | 33610573  | 0.441116    | 0.507  |
| W8843 | 18 | 54081842  | 54089919  | 0.01045802  | 0.919  |
| W8847 | 18 | 55028517  | 55034846  | 0.1699787   | 0.68   |
| W8883 | 18 | 60511319  | 60569424  | 0.7729019   | 0.379  |
| W8893 | 18 | 64897804  | 64908767  | 0.5571776   | 0.455  |
| W9097 | 19 | 59939919  | 60040503  | 1.577734    | 0.209  |
| W9319 | 20 | 52488072  | 52491840  | 0.5234058   | 0.469  |
| W9337 | 20 | 55212415  | 55229082  | 3.12407     | 0.0771 |
| W9342 | 20 | 55984705  | 55996322  | 5.517019    | 0.0188 |
| W9407 | 21 | 18975170  | 19002805  | 1.608739    | 0.205  |
| W9622 | 22 | 41570644  | 41842773  | 1.042722    | 0.307  |

|       |    |          |          |           |       |
|-------|----|----------|----------|-----------|-------|
| W9624 | 22 | 42193069 | 42445743 | 0.8273893 | 0.363 |
|-------|----|----------|----------|-----------|-------|

## Supplementary Methods

### Normalization

Each Affymetrix 500k probeset is summarized into allelic intensities by taking the median of the perfect match probes for the A allele and B alleles respectively. Using heterozygotes with high posterior probabilities from the WTCCC analysis <sup>1</sup> for which the intensity for the A and B alleles is assumed to be equal, a locus dependent correction factor is calculated,  $\phi$ , which accounts for systematic differences in A and B allele intensities. The A and B allele intensities are then combined to give a log diploid copy number intensity  $I = \log_2[A + \phi B]$ . Quantile Normalization <sup>2</sup> is then performed on the  $I$  values separately for the *NspI* and *StyI* arrays. The intensity at a locus is known to be dependent on both the restriction fragment length and GC content <sup>3</sup>. These are corrected for using cubic polynomials. The intensity values are then median normalized with respect to the median at that locus within a 96-well microtitre plate. The resultant value gives the diploid copy number  $\log_2$  ratio,  $R$ . There is also known to be a non-linear autocorrelation in the  $R$  values across the genome. A loess correction on a sample by sample basis is performed to remove this bias <sup>4</sup>. This pipeline was implemented in C++ utilizing the ROOT framework <sup>5</sup>.

### Testing for differential errors

The likelihood ratio testing framework provides a natural way to test for the differences in measurement characteristics between cases and controls. Under the null hypothesis, the signal model described in Methods is fitted constraining the component means and variances to be the same in both groups. Under the alternate hypotheses the means, variances or both are allowed to differ between groups. If a CNV has  $n$  components, the likelihood ratio test statistic in the presence of no differential bias is distributed as  $\chi^2$  with  $n$ ,  $n$  or  $2n$  degrees of freedom, respectively.

## Probe weighting

The signal  $x$  is a composite of measurements from a collection of probesets, each one being a normalised allele sum intensity for one SNP within the presumed CNV (see above). The simplest way to construct a composite signal is to sum these measurements. However an improvement is to use the first principal component; this down-weights measurements not highly correlated with the remainder. Having fitted the Gaussian mixture model as described above, a further improvement can be obtained by using the first Fisher linear discriminant function, with the calculations modified to allow for the uncertainty in group assignment. If there are  $M$  probesets contributing to the score, we have an  $S \times M$  matrix of signal intensities,  $U$  and, following an initial fit of the Gaussian mixture model, we have the  $S \times (N + 1)$  matrix of posterior copy number probabilities,  $P$ . We then find the first canonical correlation *i.e.* we compute the values of  $n$  and  $h$  which maximize the correlation between  $Un$  and  $Ph$ . The first canonical variate  $Un$  then provides our improved composite score. These calculations are carried out by a standard function in R. When a composite signal is calculated from only two probesets, rather than use the probe-weighting method described above we simply take the mean of the two probesets.

## The signal-to-noise ratio, $Q$

In simulations, the component Gaussian distributions for signal intensity conditional upon underlying copy number had equal standard deviation and equally spaced means. The signal-to-noise ratio,  $Q$ , is then defined as the ratio of the separation between adjacent means divided by the within-component standard deviation. For real data, the position is more complicated since spacings and standard deviations can vary and, consequently, the signal-to-noise ratio varies. While it would be possible to derive an overall measure of the clustering quality from properties of the likelihood function, this would not serve our requirement for an easily understood measure and we have elected to define  $Q$  as a simple averaged value of the signal to noise ratios between adjacent copy numbers, with weights reflecting the frequency of copy numbers. Precisely, summing over all pairs of adjacent clusters  $(i,j)$ :

$$Q = \frac{\sum_{i,j} \alpha_i \alpha_j \frac{|\mu_i - \mu_j|}{\sigma_{ij}}}{\sum_{i,j} \alpha_i \alpha_j}$$

where  $\alpha_i$  is the relative frequency of cluster  $i$ ,  $\mu_i$  the center of the cluster and

$\sigma_{ij} = \frac{\alpha_i \sigma_i + \alpha_j \sigma_j}{\alpha_i + \alpha_j}$  is a weighted standard deviation for the pair  $(i,j)$ .

## Simulations

The six general methods of copy number association testing outlined in the main text are examined for type I error rates over a range of clustering qualities and in the presence of two different forms of bias. For five of these methods, statistical tests of trend are applied, which are expected to be asymptotically distributed as  $\chi^2$  with one degree of freedom.

Simulated Gaussian mixtures with three components are generated in R using the package `nor1mix`. The mixture probabilities follow Hardy-Weinberg equilibrium with a minor allele frequency,  $f$ , of 0.3. The means and variances of the components are given by  $\mu=(2,3,4)$  and  $\sigma^2 = \sigma_F^2(1,s,s^2)$  where  $s$  is a scale factor equal to 1.5 and  $\sigma_F^2$  is the variance of the first component, which can be expressed in terms of  $Q, \mu, f, s$ .

To investigate the effect of clustering quality on the Type I error, two groups each containing 2000 individuals are sampled from ten mixtures with  $Q$  ranging from 7.5 to 3.0. To simulate the effect of differential mean, two parent distributions are constructed with  $Q$  fixed at 4.5. The first of these has component means located at  $\mu$  and the second has component means located at  $\mu'=\mu+\Delta\mu$  with  $\Delta\mu$  taking ten values ranging from 0 to 0.18. A group containing 2000 individuals is sampled from each of these parent distributions. Differential variance is simulated in an analogous way with parent distributions constructed with  $Q$  fixed at 4.5, the first having component variances given by  $\sigma^2$  and the second by  $\sigma'^2 = \sigma^2 \times \Delta\sigma^2$  with  $\Delta\sigma^2$  taking ten values ranging from 0 to 1.8. A group containing 2000 individuals is sampled from each of these parent

distributions.

For each different hypothetical association test (of which there are thirty in total) 1000 pairs of distributions are simulated and a quantile-quantile plot produced. To quantify the over-dispersion a straight line is fit to the first 90% of values with the intercept constrained to be zero. The value  $\lambda$  is given by the fitted gradient of the line.

## References

1. WTCCC. Genome-wide association study of 14,000 cases of seven common diseases and 3,000 shared controls. *Nature* **447**, 661-78 (2007).
2. Bolstad, B.M., Irizarry, R.A., Astrand, M. & Speed, T.P. A comparison of normalization methods for high density oligonucleotide array data based on variance and bias. *Bioinformatics* **19**, 185-93 (2003).
3. Nannya, Y. et al. A robust algorithm for copy number detection using high-density oligonucleotide single nucleotide polymorphism genotyping arrays. *Cancer Res* **65**, 6071-9 (2005).
4. Marioni, J.C. et al. Breaking the waves: improved detection of copy number variation from microarray-based comparative genomic hybridisation. *Genome Biology* **8**, R228 (2007).
5. Brun, R. & Rademakers, F. ROOT - An Object Oriented Data Analysis Framework. *Nucl. Inst. & Meth. in Phys. Res A* **389**, 81-86 (1997).
